# Supplementary material for: Insights from the computational studies on the oxidized as-isolated state of [NiFeSe] hydrogenase from D. vulgaris Hildenborough
Source: Royal Society of Chemistry journal article supplement (doi:10.1039/c5cp03071d), 2015-01-01
Supplement: c5cp03071d1.pdf [file c5cp03071d1.pdf]

## Supporting information

### Insights from the Computational Studies on the Oxidized as Isolated State of [NiFeSe] Hydrogenase from *D. vulgaris* Hildenborough

*Swaminathan Angeline Vedha, Gunasekaran Velmurugan, Rajangam Jagadeesan &  
Ponnambalam Venuvanalingam\**

Theoretical and Computational Chemistry Laboratory

School of Chemistry

Bharathidasan University

Tiruchirappalli- 620 024

E-mail: [venuvanalingam@yahoo.com](mailto:venuvanalingam@yahoo.com).

**Phone (Office):**+91 431 2407053 (Ext: 540), **Fax:** +91 431 2407045

\*Author for correspondence

E-Mail: [venuvanalingam@yahoo.com](mailto:venuvanalingam@yahoo.com), Ph: ++91-431-2407053, Fax: ++91-431-2407045

## Supporting Information Table of Contents

| <b>List of Figures</b> |                                                                                                                                                                                                                                                                                                                         |     |
|------------------------|-------------------------------------------------------------------------------------------------------------------------------------------------------------------------------------------------------------------------------------------------------------------------------------------------------------------------|-----|
| <b>1.</b>              | Performance of various Functionals in reproducing the structural features of the oxidized [NiFeSe] Hase in DvH.                                                                                                                                                                                                         | SF1 |
| <b>2</b>               | Geometries proposed for Conf-II and Optimized at BP86/TZVP level.                                                                                                                                                                                                                                                       | SF2 |
| <b>3</b>               | Gradient path of the electron density between the Ni-S-Se in Conf I.                                                                                                                                                                                                                                                    | SF3 |
| <b>4.</b>              | NBO interactions that contribute majorly to the ground state stabilization of the Conf-I, Conf-II & Conf-III of Ni-IS state of [NiFeSe] Hase.                                                                                                                                                                           | SF4 |
| <b>5.</b>              | Optimized Geometries of the Peroxo inhibited states of Conf-I and Conf-III showing the Ni- Fe distances in Å units                                                                                                                                                                                                      | SF5 |
| <b>List of Tables</b>  |                                                                                                                                                                                                                                                                                                                         |     |
| <b>1.</b>              | Natural Spin Orbital calculations revealing the type of the molecular orbital and their occupancy numbers in the SSW model                                                                                                                                                                                              | ST1 |
| <b>2.</b>              | Geometric features of the model structures proposed for Conf-II.                                                                                                                                                                                                                                                        | ST2 |
| <b>3.</b>              | NPA Net atomic Charges at Ni, Fe, Se and bridging Sulphurs ( $S_{\text{brdg}}$ ) in all the models studied                                                                                                                                                                                                              | ST3 |
| <b>4.</b>              | Topological properties at the BCPs in Ni-S, Ni-Se, and S-Se bonds. $\rho(r)$ in units of $e\text{\AA}^{-3}$ , $L(r)$ in units of $e\text{\AA}^{-3}$ , $G(r)$ , $V(r)$ , $H(r)$ in units of a.u. $\text{\AA}^{-3}$ .                                                                                                     | ST4 |
| <b>5.</b>              | Table ST5 Volume(Vol), Charge and average number of electrons(NVol) present in the atomic basins of Ni and Se in Conf-I & Conf-III along with the average electron density at Ni (Avr $\rho(r)$ ) and Delocalization Index $\delta$ ( $\Omega_{\text{Ni}}$ , $\Omega_{\text{Se}}$ ) values in Ni/Se atomic basins (DI). | ST5 |

**Figure SF1.** Performance of various Functionals in reproducing the structural features of the oxidized [NiFeSe] Hase in DvH. XRS represents the parameters reported for the crystal structure.

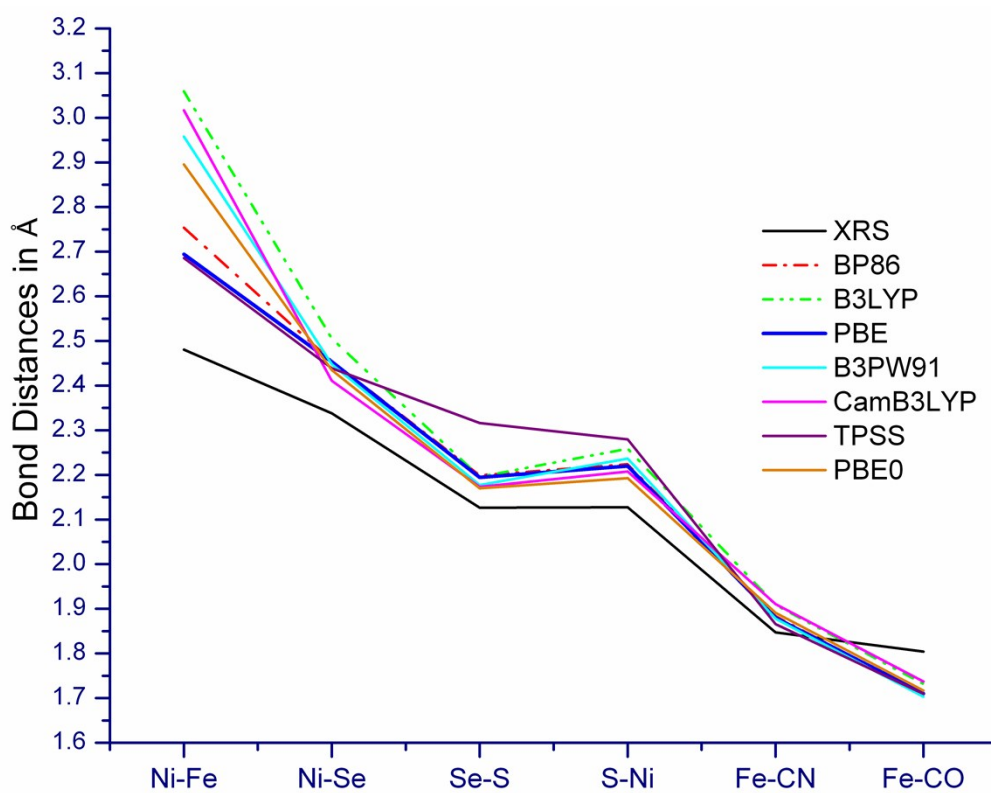

**Figure SF2.** Structures of the geometries proposed for Conf-II and Optimized at BP86/TZVP level. Hydrogens are omitted for clarity. The legends at the bottom of the optimized geometry are the Ni-Fe distances ( $\text{\AA}$ ) and the Ni-S-Se bond angle ( $^\circ$ ).

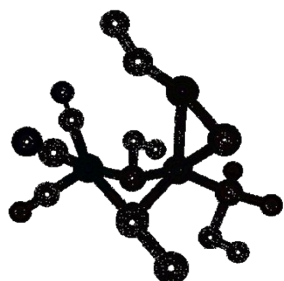

SPY-1  
2.85 $\text{\AA}$ , 71.7 $^\circ$

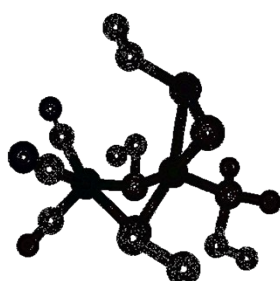

SPY-2  
2.80 $\text{\AA}$ , 68.4 $^\circ$

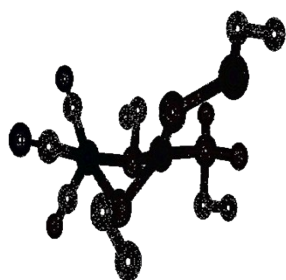

SSW  
3.09 $\text{\AA}$ , 122.1 $^\circ$

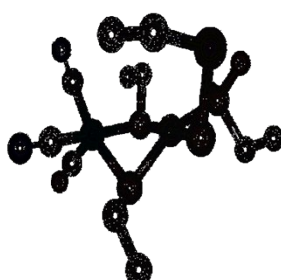

SPL-1  
3.09 $\text{\AA}$ , 106.1 $^\circ$

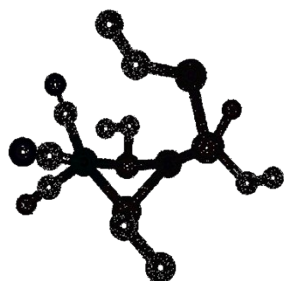

SPL-2  
3.03 $\text{\AA}$ , 99 $^\circ$

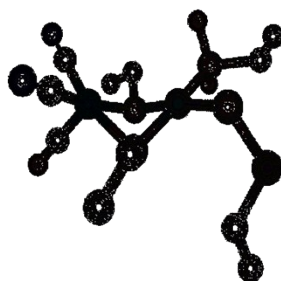

SPL-3  
3.15 $\text{\AA}$ , 106.2 $^\circ$

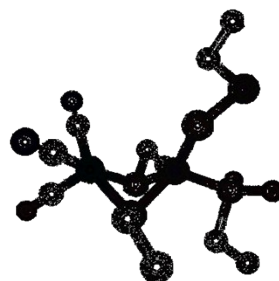

Conf-II  
2.77 $\text{\AA}$ , 106.7 $^\circ$

**Figure SF3.** Gradient path of the electron density between the Ni-S-Se in Conf I.

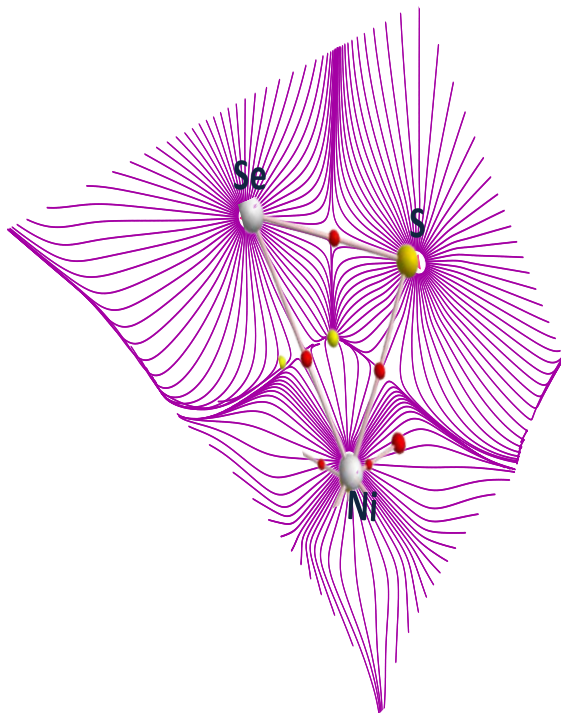

**Figure SF4.** NBO interactions that contribute majorly to the ground state stabilization of the Conf-I, Conf-II & Conf-III of Ni-IS state of [NiFeSe] Hase.

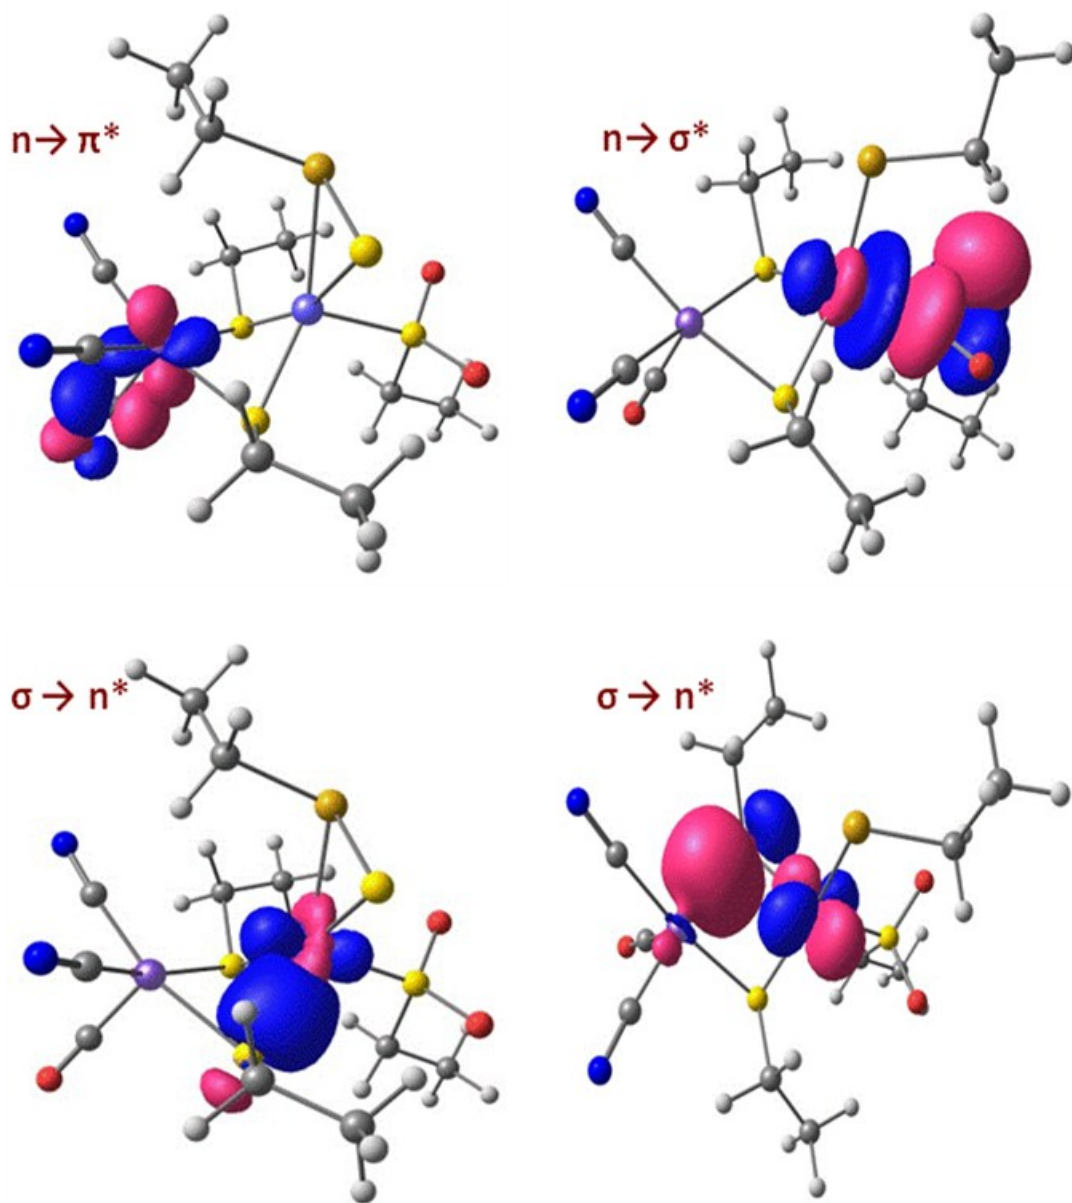

**Figure SF5.** Optimized Geometries of the Peroxo inhibited states of Conf-I and Conf-III showing the Ni- Fe distances in Å units.

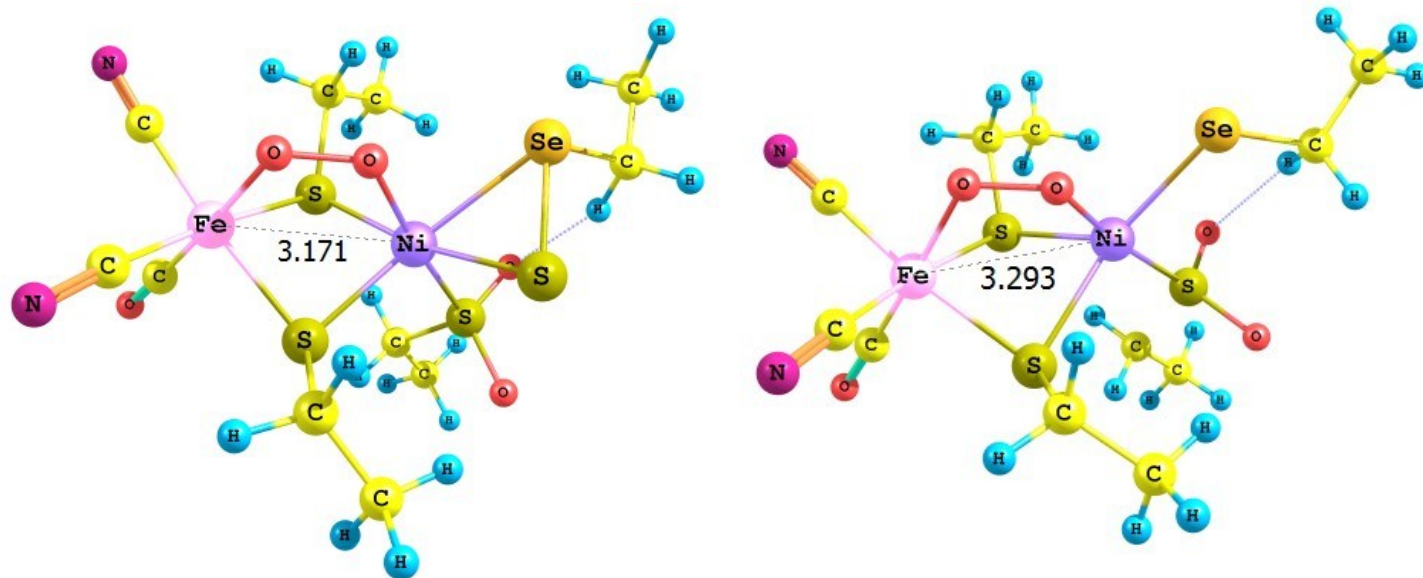

Peroxo inhibited state of Conf-I/ -153.8560 a.u

Peroxo inhibited state of Conf-III/ -153.8582 a.u

**Table ST1.** Results of the Natural Spin Orbital calculations revealing the type of the molecular orbital and their occupancy numbers in the SSW model.

| SSW                              |           |              |                |       |                 |
|----------------------------------|-----------|--------------|----------------|-------|-----------------|
| MO no                            | Atom type | Orbital type | MO Coefficient |       | Total Occupancy |
| 333                              | Fe16(1)   | d3z2-r2      | 0.723          | 0.362 | 0.362           |
| 334                              | Fe16(1)   | dxz          | 0.614          | 0.307 | 0.307           |
| 335                              | Fe16(1)   | dyz          | 0.717          | 0.358 | 0.358           |
| 336                              | Fe16(1)   | dx2-y2       | 0.718          | 0.359 | 0.359           |
| 337                              | Fe16(1)   | dxy          | 0.670          | 0.335 | 0.335           |
| 338                              | Fe16(2)   | d3z2-r2      | 0.282          | 0.141 | 0.141           |
| 339                              | Fe16(2)   | dxz          | 0.248          | 0.124 | 0.124           |
| 340                              | Fe16(2)   | dyz          | 0.278          | 0.139 | 0.139           |
| 341                              | Fe16(2)   | dx2-y2       | 0.282          | 0.141 | 0.141           |
| 342                              | Fe16(2)   | dxy          | 0.263          | 0.132 | 0.132           |
| 343                              | Fe16(3)   | d3z2-r2      | 0.217          | 0.109 | 0.109           |
| 344                              | Fe16(3)   | dxz          | 0.178          | 0.089 | 0.089           |
| 345                              | Fe16(3)   | dyz          | 0.214          | 0.107 | 0.107           |
| 346                              | Fe16(3)   | dx2-y2       | 0.207          | 0.104 | 0.104           |
| 347                              | Fe16(3)   | dxy          | 0.210          | 0.105 | 0.105           |
| 480                              | Ni23(1)   | d3z2-r2      | 0.914          | 0.457 | 0.457           |
| 481                              | Ni23(1)   | dxz          | 0.938          | 0.469 | 0.469           |
| 482                              | Ni23(1)   | dyz          | 0.956          | 0.478 | 0.478           |
| 483                              | Ni23(1)   | dx2-y2       | 0.995          | 0.498 | 0.498           |
| 484                              | Ni23(1)   | dxy          | 0.706          | 0.353 | 0.353           |
| 485                              | Ni23(2)   | d3z2-r2      | 0.337          | 0.169 | 0.169           |
| 486                              | Ni23(2)   | dxz          | 0.346          | 0.173 | 0.173           |
| 487                              | Ni23(2)   | dyz          | 0.351          | 0.176 | 0.176           |
| 488                              | Ni23(2)   | dx2-y2       | 0.362          | 0.181 | 0.181           |
| 489                              | Ni23(2)   | dxy          | 0.266          | 0.133 | 0.133           |
| 490                              | Ni23(3)   | d3z2-r2      | 0.228          | 0.114 | 0.114           |
| 491                              | Ni23(3)   | dxz          | 0.233          | 0.117 | 0.117           |
| 492                              | Ni23(3)   | dyz          | 0.240          | 0.120 | 0.120           |
| 493                              | Ni23(3)   | dx2-y2       | 0.252          | 0.126 | 0.126           |
| 494                              | Ni23(3)   | dxy          | 0.187          | 0.093 | 0.093           |
| Total no of electrons in Ni d= 6 |           |              |                |       |                 |



**Table ST2.** Geometric features of the model structures proposed for Conf-II. (Bond lengths (Å) and bond angles (°)).

| Selected Bond Parameters of Models of Conf-II |       |                         |                         |       |       |       |          |          |         |        |                         |
|-----------------------------------------------|-------|-------------------------|-------------------------|-------|-------|-------|----------|----------|---------|--------|-------------------------|
|                                               | Ni-Fe | Fe-S <sub>brdg(p)</sub> | Fe-S <sub>brdg(d)</sub> | Ni-S  | Ni-Se | S-Se  | Fe-C(N)p | Fe-C(N)d | Fe-C(O) | FeSpNi | Total Energy (Hartrees) |
| SPY1                                          | 2.847 | 2.270                   | 2.296                   | 2.232 | 2.603 | 2.213 | 1.899    | 1.899    | 1.704   | 77.38  | -7534.3569              |
| SPY2                                          | 2.798 | 2.286                   | 2.285                   | 2.221 | 2.487 | 2.199 | 1.886    | 1.889    | 1.707   | 76.21  | -7534.3537              |
| SSW                                           | 3.091 | 2.278                   | 2.316                   | 2.183 | 3.866 | 2.235 | 1.900    | 1.899    | 1.691   | 86.11  | -7534.3603              |
| SPL1                                          | 3.098 | 2.283                   | 2.299                   | 2.229 | 3.573 | 2.241 | 1.894    | 1.899    | 1.688   | 85.92  | -7534.3623              |
| SPL2                                          | 3.029 | 2.283                   | 2.296                   | 2.235 | 3.400 | 2.234 | 1.894    | 1.897    | 1.689   | 83.61  | -7534.3621              |
| SPL3                                          | 3.153 | 2.290                   | 2.284                   | 2.231 | 3.587 | 2.254 | 1.895    | 1.897    | 1.687   | 87.22  | -7534.3612              |

**Table ST3.** NPA Net atomic Charges at Ni, Fe, Se and bridging Sulphurs ( $S_{\text{brdg}}$ ) in all the models studied.

| <b>NPA Charges</b> |        |        |        |        |        |        |        |       |        |
|--------------------|--------|--------|--------|--------|--------|--------|--------|-------|--------|
|                    | Ni     | Fe     | Se     | S12    | S3     | S15    | S8     | C21   | O22    |
| SPY1               | -0.314 | -1.205 | 0.315  | -0.268 | 1.623  | 0.221  | 0.204  | 0.843 | -0.524 |
| SPY2               | -0.315 | -1.206 | 0.315  | -0.268 | 1.623  | 0.221  | 0.204  | 0.843 | -0.524 |
| SSW                | -0.227 | -1.076 | 0.149  | -0.336 | 1.621  | 0.154  | 0.215  | 0.859 | -0.519 |
| SPL1               | -0.171 | -1.098 | 0.193  | -0.404 | 1.631  | 0.188  | 0.189  | 0.859 | -0.516 |
| SPL2               | -0.173 | -1.117 | 0.185  | -0.393 | 1.629  | 0.195  | 0.195  | 0.858 | -0.518 |
| SPL3               | -0.130 | -1.084 | 0.087  | -0.378 | 1.632  | 0.193  | 0.170  | 0.860 | -0.516 |
| Conf-1             | -0.360 | -1.094 | 0.465  | -0.181 | 1.647  | 0.257  | 0.298  | 0.863 | -0.465 |
| Conf-II            | -0.066 | -0.504 | -0.081 | -0.202 | 0.527  | -0.041 | -0.073 | 0.334 | -0.277 |
| Conf-III           | -0.219 | -1.122 | -0.103 | -      | 1.644  | 0.229  | 0.143  | 0.851 | -0.519 |
| ICC1               | -0.110 | -1.163 | -0.137 | -      | -0.219 | 0.241  | 0.175  | 0.841 | -0.529 |

**Table ST4.** Topological properties at the BCPs in Ni-S, Ni-Se, and S-Se bonds.  $\rho(r)$  in units of  $e\text{\AA}^{-3}$ ,  $L(r)$  in units of  $e\text{\AA}^{-3}$ ,  $G(r)$ ,  $V(r)$ ,  $H(r)$  in units of a.u.  $\text{\AA}^{-3}$ .

| <b>Ni-S BCP</b>  |           |        |        |        |       |        |                |
|------------------|-----------|--------|--------|--------|-------|--------|----------------|
|                  | $\rho(r)$ | $L(r)$ | $G(r)$ | $H(r)$ | E     | $V(r)$ | $ -V(r) /G(r)$ |
| SPL1             | 0.084     | -0.041 | 0.069  | -0.027 | 0.053 | -0.096 | 1.391          |
| SPL2             | 0.084     | -0.041 | 0.067  | -0.027 | 0.059 | -0.095 | 1.417          |
| SPL3             | 0.084     | -0.043 | 0.069  | -0.027 | 0.036 | -0.097 | 1.405          |
|                  |           |        |        |        |       |        |                |
| SPY1             | 0.083     | -0.039 | 0.066  | -0.027 | 0.096 | -0.093 | 1.409          |
| SPY2             | 0.085     | -0.040 | 0.068  | -0.028 | 0.051 | -0.097 | 1.426          |
|                  |           |        |        |        |       |        |                |
| SSW              | 0.09      | -0.046 | 0.077  | -0.031 | 0.026 | -0.108 | 1.402          |
| Conf-II          | 0.098     | -0.049 | 0.085  | -0.036 | 0.047 | -0.122 | 1.435          |
| Conf-I           | 0.083     | -0.041 | 0.067  | -0.027 | 0.023 | -0.095 | 1.418          |
| <b>S-Se BCPs</b> |           |        |        |        |       |        |                |
| SPL1             | 0.107     | 0.002  | 0.041  | -0.043 | 0.043 | -0.085 | 2.073          |
| SPL2             | 0.108     | 0.003  | 0.041  | -0.044 | 0.037 | -0.086 | 2.097          |
| SPL3             | 0.107     | 0.001  | 0.040  | -0.041 | 0.022 | -0.081 | 2.025          |
| SPY1             | 0.112     | 0.003  | 0.045  | -0.048 | 0.068 | -0.094 | 2.089          |
| SPY2             | 0.115     | 0.004  | 0.047  | -0.051 | 0.094 | -0.099 | 2.106          |
| SSW              | 0.108     | 0.002  | 0.042  | -0.044 | 0.059 | -0.087 | 2.071          |
|                  |           |        |        |        |       |        |                |
| Conf-I           | 0.116     | 0.004  | 0.048  | -0.053 | 0.095 | -0.101 | 2.104          |
| Conf-II          | 0.112     | 0.003  | 0.044  | -0.047 | 0.047 | -0.091 | 2.068          |
| <b>Ni-Se BCP</b> |           |        |        |        |       |        |                |
| SPY1             | 0.051     | -0.026 | 0.041  | -0.015 | 1.063 | -0.056 | 1.380          |
| SPY2             | 0.058     | -0.029 | 0.047  | -0.018 | 0.515 | -0.064 | 1.361          |
|                  |           |        |        |        |       |        |                |
| Conf-III         | 0.075     | -0.030 | 0.052  | -0.022 | 0.061 | -0.074 | 1.423          |
| Conf-I           | 0.060     | -0.034 | 0.048  | -0.014 | 0.354 | -0.062 | 1.291          |

**Table ST5.** Volume(Vol), Charge and average number of electrons(NVol) present in the atomic basins of Ni and Se in Conf-I & Conf-III along with the average electron density at Ni (Avr  $\rho(r)$ ) and Delocalization Index  $\delta$  ( $\Omega_{Ni}$ ,  $\Omega_{Se}$ ) values in Ni/Se atomic basins (DI).

|          |          |             |           |                                            |               |
|----------|----------|-------------|-----------|--------------------------------------------|---------------|
|          | Vol @ Ni | Charge @ Ni | NVol @ Ni | $\delta$ ( $\Omega_{Ni}$ , $\Omega_{Se}$ ) | Avr $\rho(r)$ |
| Conf-I   | 85.79    | 0.496       | 27.50     | 1.6062                                     | 0.314         |
| Conf-III | 102.90   | 0.558       | 27.44     | 2.7677                                     | 0.262         |
|          | Vol @ Se | Charge @ Se | NVol @ Se |                                            | Avr $\rho(r)$ |
| Conf-I   | 204.95   | 0.0765      | 33.88     |                                            | 0.166         |
| Conf-III | 256.07   | -33.83      | 34.27     |                                            | 0.133         |

**Table ST6.** bond parameters of the optimized geometries of conf-I, conf-II and conf-III obtained by solvating the structures in water by polarizable Continuum Model at BP86/TZVP.

| Selected Bond lengths (Å) and Bond angles |       |                         |                         |       |       |       |          |          |         |        |                         |
|-------------------------------------------|-------|-------------------------|-------------------------|-------|-------|-------|----------|----------|---------|--------|-------------------------|
|                                           | Ni-Fe | Fe-S <sub>brdg(p)</sub> | Fe-S <sub>brdg(d)</sub> | Ni-S  | Ni-Se | S-Se  | Fe-C(N)p | Fe-C(N)d | Fe-C(O) | FeSpNi | Total Energy (Hartrees) |
| Conf-I                                    | 2.773 | 2.269                   | 2.292                   | 2.233 | 2.437 | 2.188 | 1.888    | 1.888    | 1.709   | 75.7   | -7534.32082             |
| Conf-II                                   | 2.831 | 2.269                   | 2.288                   | 2.233 | 2.567 | 2.209 | 1.897    | 1.897    | 1.703   | 76.9   | -7534.47173             |
| Conf-III                                  | 3.021 | 2.322                   | 2.257                   | -     | 2.345 | -     | 1.900    | 1.898    | 1.694   | 82.4   | -7096.89197             |

## Table ST4 Output :

Record of properties at a point in space

Coordinates of point: 0.166063 4.413734 0.230132

Analyzed density function: RHO, electron density

Density value: 0.11249925

Gradient: 0.00000000 -0.00000000 0.00000000

Hessian matrix: -0.03336347 0.00350564 0.13259656  
0.00350564 -0.10131648 0.00507167  
0.13259656 0.00507167 0.12239378

Eigenvalues of Hessian: -0.10929525 -0.10140756 0.19841664

First Eigenvector: -0.86662465 0.06643094 0.49451860

Second Eigenvector: -0.04750786 -0.99758060 0.05075386

Third Eigenvector: 0.49669379 0.02049103 0.86768393

Properties:

Rho 1.1249924646e-001

KEG 4.4194140144e-002

KEK 4.7265682480e-002 EOA -4.7354383623e-002

Lap 3.0715423368e-003

I 3.1614837170e-003

VNET -6.2247624568e+000 VNET(Cor) -6.2305978315e+000

EHF -3.0887483871e+000

VREP(Cor) 6.1330379236e+000

V(Atom) -9.7559907979e-002

VIR 9.1459822624e-002

Overlap matrix, number of orbitals: 139

|             |             |             |             |             |             |             |             |             |             |
|-------------|-------------|-------------|-------------|-------------|-------------|-------------|-------------|-------------|-------------|
| 0.00011702  |             |             |             |             | -0.00037633 | 0.00002812  | -0.00068883 | -0.00136568 | -0.00024698 |
| -0.00000874 | 0.00000065  |             |             |             | 0.00035760  | -0.00002672 | 0.00065456  | 0.00129773  | 0.00023469  |
| 0.00021420  | -0.00001601 | 0.00039207  |             |             | -0.00058585 | 0.00004378  | -0.00107236 | -0.00212606 | -0.00038449 |
| 0.00042467  | -0.00003174 | 0.00077732  | 0.00154111  |             | 0.00047848  | -0.00003576 | 0.00087581  | 0.00173638  | 0.00031402  |
| 0.00007680  | -0.00000574 | 0.00014057  | 0.00027870  | 0.00005040  | 0.00019446  | -0.00001453 | 0.00035595  | 0.00070570  | 0.00012762  |
| 0.00007110  | -0.00000531 | 0.00013014  | 0.00025801  | 0.00004666  | 0.00035465  | -0.00002650 | 0.00064916  | 0.00128702  | 0.00023275  |
| -0.00002966 | 0.00000222  | -0.00005429 | -0.00010763 | -0.00001946 | -0.00008006 | 0.00000598  | -0.00014654 | -0.00029052 | -0.00005254 |
| -0.00040633 | 0.00003036  | -0.00074375 | -0.00147455 | -0.00026666 | 0.00034525  | -0.00002580 | 0.00063195  | 0.00125291  | 0.00022658  |
| 0.00008302  | -0.00000620 | 0.00015196  | 0.00030128  | 0.00005449  | 0.00015416  | -0.00001152 | 0.00028218  | 0.00055945  | 0.00010117  |
| 0.00017926  | -0.00001340 | 0.00032812  | 0.00065053  | 0.00011764  | 0.00020416  | -0.00001526 | 0.00037370  | 0.00074089  | 0.00013399  |
| 0.00016350  | -0.00001222 | 0.00029927  | 0.00059333  | 0.00010730  | 0.00024003  | -0.00001794 | 0.00043936  | 0.00087107  | 0.00015753  |
| 0.00009041  | -0.00000676 | 0.00016549  | 0.00032810  | 0.00005933  | 0.00012969  | -0.00000969 | 0.00023738  | 0.00047064  | 0.00008511  |
| 0.00009488  | -0.00000709 | 0.00017366  | 0.00034430  | 0.00006227  | -0.00013728 | 0.00001026  | -0.00025128 | -0.00049819 | -0.00009009 |
| 0.00017226  | -0.00001287 | 0.00031531  | 0.00062514  | 0.00011305  | 0.00001941  | -0.00000145 | 0.00003553  | 0.00007044  | 0.00001274  |
| 0.00003330  | -0.00000249 | 0.00006095  | 0.00012084  | 0.00002185  | 0.00004081  | -0.00000305 | 0.00007469  | 0.00014809  | 0.00002678  |
| -0.00016503 | 0.00001233  | -0.00030208 | -0.00059890 | -0.00010831 | 0.00011410  | -0.00000853 | 0.00020885  | 0.00041406  | 0.00007488  |
| 0.00035854  | -0.00002679 | 0.00065629  | 0.00130115  | 0.00023531  | 0.00005703  | -0.00000426 | 0.00010439  | 0.00020697  | 0.00003743  |
| 0.00035973  | -0.00002688 | 0.00065846  | 0.00130547  | 0.00023609  | -0.00009597 | 0.00000717  | -0.00017566 | -0.00034827 | -0.00006298 |
| -0.00048112 | 0.00003595  | -0.00088066 | -0.00174599 | -0.00031575 | 0.00043137  | -0.00003224 | 0.00078959  | 0.00156543  | 0.00028310  |
| 0.00016137  | -0.00001206 | 0.00029538  | 0.00058562  | 0.00010591  | 0.00025422  | -0.00001900 | 0.00046534  | 0.00092257  | 0.00016684  |
| -0.00020960 | 0.00001566  | -0.00038365 | -0.00076063 | -0.00013756 | -0.00028893 | 0.00002159  | -0.00052887 | -0.00104853 | -0.00018962 |
| 0.00004280  | -0.00000320 | 0.00007834  | 0.00015532  | 0.00002809  | 0.00008688  | -0.00000649 | 0.00015902  | 0.00031527  | 0.00005701  |
| -0.00021404 | 0.00001599  | -0.00039177 | -0.00077673 | -0.00014047 | -0.00015932 | 0.00001191  | -0.00029163 | -0.00057818 | -0.00010456 |
| -0.00016910 | 0.00001264  | -0.00030952 | -0.00061365 | -0.00011097 | 0.00004539  | -0.00000339 | 0.00008308  | 0.00016472  | 0.00002979  |
| 0.00019265  | -0.00001440 | 0.00035263  | 0.00069912  | 0.00012643  | 0.00006088  | -0.00000455 | 0.00011143  | 0.00022093  | 0.00003995  |
| 0.00022950  | -0.00001715 | 0.00042009  | 0.00083287  | 0.00015062  | 0.00011968  | -0.00000894 | 0.00021906  | 0.00043431  | 0.00007854  |
| -0.00017823 | 0.00001332  | -0.00032623 | -0.00064678 | -0.00011697 | -0.00023233 | 0.00001736  | -0.00042526 | -0.00084312 | -0.00015247 |
| 0.00025195  | -0.00001883 | 0.00046117  | 0.00091432  | 0.00016535  | -0.00011281 | 0.00000843  | -0.00020649 | -0.00040939 | -0.00007404 |
| 0.00029664  | -0.00002217 | 0.00054298  | 0.00107652  | 0.00019468  | 0.00012448  | -0.00000930 | 0.00022785  | 0.00045174  | 0.00008169  |
| 0.00008140  | -0.00000608 | 0.00014900  | 0.00029540  | 0.00005342  | -0.00003163 | 0.00000236  | -0.00005790 | -0.00011479 | -0.00002076 |
| -0.00024389 | 0.00001823  | -0.00044641 | -0.00088506 | -0.00016006 | -0.00018346 | 0.00001371  | -0.00033580 | -0.00066577 | -0.00012040 |
| -0.00001663 | 0.00000124  | -0.00003045 | -0.00006036 | -0.00001092 | 0.00011346  | -0.00000848 | 0.00020768  | 0.00041175  | 0.00007446  |
| -0.00005180 | 0.00000387  | -0.00009482 | -0.00018800 | -0.00003400 | 0.00004397  | -0.00000329 | 0.00008048  | 0.00015955  | 0.00002885  |
| 0.00007676  | -0.00000574 | 0.00014050  | 0.00027856  | 0.00005038  | -0.00001944 | 0.00000145  | -0.00003557 | -0.00007053 | -0.00001275 |
| 0.00006517  | -0.00000487 | 0.00011928  | 0.00023649  | 0.00004277  | -0.00003766 | 0.00002814  | -0.00068934 | -0.00136668 | -0.00024716 |
| 0.00010032  | -0.00000750 | 0.00018362  | 0.00036405  | 0.00006584  | -0.00020642 | 0.00001543  | -0.00037783 | -0.00074909 | -0.00013547 |
| 0.00033426  | -0.00002498 | 0.00061183  | 0.00121301  | 0.00021937  | -0.00005127 | 0.00000383  | -0.00009384 | -0.00018605 | -0.00003365 |
| -0.00036778 | 0.00002748  | -0.00067320 | -0.00133468 | -0.00024137 | 0.00009138  | -0.00000683 | 0.00016726  | 0.00033161  | 0.00005997  |
| -0.00018453 | 0.00001379  | -0.00033776 | -0.00066965 | -0.00012110 | 0.00006893  | -0.00000515 | 0.00012616  | 0.00025013  | 0.00004523  |
| -0.00010662 | 0.00000797  | -0.00019516 | -0.00038693 | -0.00006997 | -0.00013422 | 0.00001003  | -0.00024569 | -0.00048710 | -0.00008809 |
| 0.00010578  | -0.00000790 | 0.00019362  | 0.00038387  | 0.00006942  | 0.00007778  | -0.00000581 | 0.00014236  | 0.00028225  | 0.00005104  |
| 0.00010209  | -0.00000763 | 0.00018687  | 0.00037050  | 0.00006700  | 0.00005247  | -0.00000392 | 0.00009604  | 0.00019040  | 0.00003443  |
| 0.00033839  | -0.00002529 | 0.00061939  | 0.00122801  | 0.00022208  | -0.00008348 | 0.00000624  | -0.00015281 | -0.00030296 | -0.00005479 |
| 0.00050506  | -0.00003774 | 0.00092447  | 0.00183286  | 0.00033146  | 0.00010230  | -0.00000764 | 0.00018725  | 0.00037125  | 0.00006714  |





















|             |             |             |             |             |             |             |             |             |             |
|-------------|-------------|-------------|-------------|-------------|-------------|-------------|-------------|-------------|-------------|
| 0.00011370  | 0.00005521  | -0.00006092 | 0.00001548  | 0.00008978  | -0.00027710 | -0.00010737 | 0.00004746  | 0.00091973  | 0.00050412  |
| 0.00029507  | 0.00014328  | -0.00015810 | 0.00004017  | 0.00023300  | -0.00023510 | -0.00009110 | 0.00004027  | 0.00078035  | 0.00042772  |
| 0.00016155  | 0.00007844  | -0.00008656 | 0.00002199  | 0.00012757  | 0.00017494  | 0.00006779  | -0.00002997 | -0.00058067 | -0.00031827 |
| 0.00007160  | 0.00003477  | -0.00003836 | 0.00000975  | 0.00005654  | -0.00008510 | -0.00003298 | 0.00001458  | 0.00028247  | 0.00015483  |
| -0.00013480 | -0.00006546 | 0.00007223  | -0.00001835 | -0.00010645 | 0.00008839  | 0.00003425  | -0.00001514 | -0.00029338 | -0.00016081 |
| -0.00065030 | -0.00031577 | 0.00034843  | -0.00008853 | -0.00051350 | 0.00009557  | 0.00003703  | -0.00001637 | -0.00031720 | -0.00017386 |
| -0.00031301 | -0.00015199 | 0.00016771  | -0.00004261 | -0.00024717 | -0.00006248 | -0.00002421 | 0.00001070  | 0.00020737  | 0.00011366  |
| 0.00000895  | 0.00000435  | -0.00000479 | 0.00000122  | 0.00000707  | -0.00015514 | -0.00006012 | 0.00002657  | 0.00051494  | 0.00028225  |
| 0.00042294  | 0.00020537  | -0.00022661 | 0.00005758  | 0.00033397  | -0.00005964 | -0.00002311 | 0.00001022  | 0.00019795  | 0.00010850  |
| 0.00073189  | 0.00035538  | -0.00039214 | 0.00009964  | 0.00057793  | -0.00004745 | -0.00001839 | 0.00000813  | 0.00015748  | 0.00008632  |
| -0.00013251 | -0.00006434 | 0.00007100  | -0.00001804 | -0.00010464 | 0.00022657  | 0.00008780  | -0.00003881 | -0.00075204 | -0.00041220 |
| 0.00010497  | 0.00005097  | -0.00005624 | 0.00001429  | 0.00008289  | 0.00025045  | 0.00009705  | -0.00004290 | -0.00083131 | -0.00045565 |
| -0.00016950 | -0.00008230 | 0.00009082  | -0.00002308 | -0.00013384 | 0.00036259  | 0.00014051  | -0.00006211 | -0.00120352 | -0.00065966 |
| 0.00014683  | 0.00007130  | -0.00007867 | 0.00001999  | 0.00011595  | -0.00037201 | -0.00014415 | 0.00006372  | 0.000123478 | 0.00067680  |
| -0.00025257 | -0.00012264 | 0.00013533  | -0.00003439 | -0.00019944 | 0.00002950  | 0.00001143  | -0.00000505 | -0.00009792 | -0.00005367 |
| 0.00056740  | 0.00027551  | -0.00030401 | 0.00007725  | 0.00044804  | -0.00012033 | -0.00004663 | 0.00002061  | 0.00039940  | 0.00021892  |
| -0.00048141 | 0.00023376  | -0.00025794 | 0.00006554  | 0.00038014  | 0.00007664  | 0.00002970  | -0.00001313 | -0.00025438 | -0.00013943 |
| 0.00035822  | -0.00017394 | 0.00019193  | -0.00004877 | -0.00028287 | 0.00025767  | 0.00009985  | -0.00004414 | -0.00085526 | -0.00046878 |
| 0.00017426  | 0.00008462  | -0.00009337 | 0.00002372  | 0.00013760  | 0.00004018  | 0.00001557  | -0.00000688 | -0.00013335 | -0.00007309 |
| -0.00018099 | -0.00008788 | 0.00009697  | -0.00002464 | -0.00014292 | 0.00012771  | 0.00004949  | -0.00002188 | -0.00042391 | -0.00023235 |
| -0.00019569 | -0.00009502 | 0.00010485  | -0.00002664 | -0.00015452 | -0.00014754 | -0.00005717 | 0.00002527  | 0.00048972  | -0.00026842 |
| 0.00012793  | 0.00006212  | -0.00006855 | 0.00001742  | 0.00010102  | -0.00050024 | -0.00019384 | 0.00008569  | 0.00166039  | 0.00091008  |
| 0.00031767  | 0.00015425  | -0.00017021 | 0.00004325  | 0.00025085  | -0.00021441 | -0.00008309 | 0.00003673  | 0.00071168  | 0.00039008  |
| 0.00012212  | 0.00005930  | -0.00006543 | 0.00001663  | 0.00009643  | -0.00041491 | -0.00016078 | 0.00007107  | 0.00137718  | 0.00057485  |
| 0.00009715  | 0.00004717  | -0.00005205 | 0.00001323  | 0.00007672  | 0.00028221  | 0.00010936  | -0.00004834 | -0.00093671 | -0.00051342 |
| -0.00046395 | -0.00022528 | 0.00024858  | -0.00006316 | -0.00036635 | 0.00024522  | 0.00009502  | -0.00004200 | -0.00081393 | -0.00044612 |
| -0.00051285 | -0.00024902 | 0.00027478  | -0.00006982 | -0.00040497 | 0.00022062  | 0.00008549  | -0.00003779 | -0.00073228 | -0.00040137 |
| -0.00074247 | -0.00036052 | 0.00039781  | -0.00010108 | -0.00058628 | -0.00003236 | -0.00001254 | 0.00000554  | 0.00010742  | 0.00005888  |
| 0.00076175  | 0.00036988  | -0.00040814 | 0.00010371  | 0.00060151  | -0.00004999 | -0.00001937 | -0.00000856 | 0.00016593  | -0.00009095 |
| -0.00060041 | -0.00029233 | 0.00003237  | -0.00000822 | -0.00004770 | 0.00018883  | 0.00007317  | -0.00003234 | -0.00062675 | -0.00034353 |
| 0.00024640  | 0.00011964  | -0.00013202 | 0.00003355  | 0.00019456  | 0.00047309  | 0.00018333  | -0.00008104 | -0.00157029 | -0.00086070 |
| -0.00015693 | -0.00007620 | 0.00008408  | -0.00002136 | -0.00012392 |             |             |             |             |             |
| -0.00052762 | -0.00025620 | 0.00028270  | -0.00007183 | -0.00041663 | 0.00002246  |             |             |             |             |
| -0.00008227 | -0.00003995 | 0.00004408  | -0.00001120 | -0.00006496 | -0.00004003 | 0.00007136  |             |             |             |
| -0.00026152 | -0.00012698 | 0.00014012  | -0.00003560 | -0.00020650 | -0.00003020 | 0.00005382  | 0.00004060  |             |             |
| 0.00030212  | 0.00014670  | -0.00016187 | 0.00004113  | 0.00023857  | 0.00005880  | -0.00010481 | -0.00007906 | 0.00015396  |             |
| 0.00102432  | 0.00049738  | -0.00054882 | 0.00013945  | 0.00080885  | -0.00003407 | 0.00006073  | 0.00004581  | -0.00008921 | 0.00005169  |
| 0.00043905  | 0.00021319  | -0.00023524 | 0.00005977  | 0.00034669  | -0.00002299 | 0.00004097  | 0.00003090  | -0.00006018 | 0.00003487  |
| 0.00084960  | 0.00041254  | -0.00045521 | 0.00011567  | 0.00067088  | 0.00003657  | -0.00006519 | -0.00004917 | 0.00009576  | -0.00005549 |
| -0.00057787 | -0.00028060 | 0.00030962  | -0.00007867 | -0.00045631 | -0.00004482 | 0.00007989  | 0.00006026  | -0.00011734 | 0.00006799  |
| -0.00050212 | -0.00024382 | 0.00026903  | -0.00006836 | -0.00039650 | -0.00002370 | 0.00004225  | 0.00003186  | -0.00006205 | 0.00003596  |
| -0.00045175 | -0.00021936 | 0.00024205  | -0.00006150 | -0.00035672 | 0.00003183  | -0.00005673 | -0.00004279 | 0.00008332  | -0.00004828 |
| 0.00006627  | 0.00003218  | -0.00003551 | 0.00000902  | 0.00005233  | -0.00004763 | 0.00008490  | 0.00006404  | -0.00012471 | 0.00007226  |
| 0.00010237  | 0.00004971  | -0.00005485 | 0.00001394  | 0.00008083  | -0.00003894 | 0.00006941  | 0.00005235  | -0.00010195 | 0.00005908  |
| -0.00038665 | -0.00018775 | 0.00020717  | -0.00005264 | -0.00030532 | 0.00013123  | -0.00023391 | -0.00017643 | 0.00034359  | -0.00019909 |
| -0.00096874 | -0.00047039 | 0.00051904  | -0.00013189 | -0.00076496 | 0.00002509  | -0.00004472 | -0.00003373 | 0.00006569  | -0.00003806 |
|             |             |             |             |             | 0.00006511  | -0.00011606 | -0.00008754 | 0.00017047  | -0.00009878 |
|             |             |             |             |             | 0.00003565  | -0.00006354 | -0.00004793 | 0.00009333  | -0.00005408 |
|             |             |             |             |             | 0.00001580  | -0.00002816 | -0.00002124 | 0.00004136  | -0.00002397 |
|             |             |             |             |             | -0.00002975 | 0.00005302  | 0.00003999  | -0.00007788 | 0.00004513  |
|             |             |             |             |             | -0.00014350 | 0.00025577  | -0.00019292 | -0.00037570 | 0.00021770  |
|             |             |             |             |             | -0.00006907 | 0.00012311  | 0.00009286  | -0.00018084 | 0.00010479  |
|             |             |             |             |             | 0.00000197  | -0.00000352 | -0.00000265 | 0.00000517  | -0.00000300 |
|             |             |             |             |             | 0.00009333  | -0.00016635 | -0.00012547 | 0.00024435  | -0.00014158 |
|             |             |             |             |             | 0.00016150  | -0.00028786 | -0.00021713 | 0.00042284  | -0.00024501 |
|             |             |             |             |             | -0.00002924 | 0.00005512  | 0.00003931  | -0.00007656 | 0.00004436  |
|             |             |             |             |             | 0.00002316  | -0.00004129 | -0.00003114 | 0.00006065  | -0.00003514 |
|             |             |             |             |             | -0.00003740 | 0.00006667  | 0.00005029  | -0.00009793 | 0.00005674  |
|             |             |             |             |             | 0.00003240  | -0.00005775 | -0.00004356 | 0.00008483  | -0.00004915 |
|             |             |             |             |             | -0.00005573 | 0.00009934  | 0.00007493  | -0.00014592 | 0.00008455  |
|             |             |             |             |             | 0.00012520  | -0.00022317 | -0.00016833 | 0.00032780  | -0.00018994 |
|             |             |             |             |             | 0.00010623  | -0.00018934 | -0.00014282 | 0.00027812  | -0.00016116 |
|             |             |             |             |             | -0.00007905 | 0.00014090  | 0.00010627  | -0.00020696 | 0.00011992  |
|             |             |             |             |             | 0.00003845  | -0.00006854 | -0.00005170 | 0.00010068  | -0.00005834 |
|             |             |             |             |             | -0.00003994 | 0.00007119  | 0.00005369  | -0.00010456 | 0.00006059  |
|             |             |             |             |             | -0.00004318 | 0.00007697  | 0.00005805  | -0.00011305 | 0.00006551  |
|             |             |             |             |             | 0.00002823  | -0.00005032 | -0.00003795 | 0.00007391  | -0.00004283 |
|             |             |             |             |             | 0.00007010  | -0.00012495 | -0.00009424 | 0.00018353  | -0.00010634 |
|             |             |             |             |             | 0.00002695  | -0.00004803 | -0.00003623 | 0.00007055  | -0.00004088 |
|             |             |             |             |             | 0.00002144  | -0.00003821 | -0.00002882 | 0.00005613  | -0.00003252 |
|             |             |             |             |             | -0.00010238 | 0.00018248  | 0.00013764  | -0.00026804 | 0.00015531  |
|             |             |             |             |             | -0.00011317 | 0.00020171  | 0.00015215  | -0.00029629 | 0.00017168  |
|             |             |             |             |             | -0.00016384 | 0.00029202  | 0.00022027  | -0.00042895 | 0.00024855  |
|             |             |             |             |             | 0.00016809  | -0.00029961 | -0.00022599 | 0.00044009  | -0.00025501 |
|             |             |             |             |             | -0.00001333 | 0.00002376  | 0.00001792  | -0.00003490 | 0.00002022  |
|             |             |             |             |             | 0.00005437  | -0.00009691 | -0.00007310 | 0.00014235  | -0.00008248 |
|             |             |             |             |             | -0.00003463 | 0.00006172  | 0.00004656  | -0.00009066 | 0.00005253  |
|             |             |             |             |             | -0.00011643 | 0.00020752  | 0.00015653  | -0.00030482 | 0.00017663  |
|             |             |             |             |             | -0.00001815 | 0.00003236  | 0.00002441  | -0.00004753 | 0.00002754  |
|             |             |             |             |             | -0.00005771 | 0.00010286  | 0.00007758  | -0.00015109 | 0.00008755  |





|             |             |             |             |             |             |             |             |             |             |
|-------------|-------------|-------------|-------------|-------------|-------------|-------------|-------------|-------------|-------------|
| -0.00033928 | -0.00015037 | 0.00028311  | 0.00136575  | 0.00065739  | 0.00015197  | -0.00007393 | 0.00007678  | 0.00008302  | 0.00003548  |
| 0.00000017  |             |             |             |             | -0.00009935 | 0.00004833  | -0.00005020 | -0.00005427 | 0.00008811  |
| 0.00000820  | 0.00038780  |             |             |             | -0.00024671 | 0.00012001  | -0.00012465 | -0.00013477 | 0.00003387  |
| 0.00001420  | 0.00067109  | 0.00116130  |             |             | -0.00009484 | 0.00004613  | -0.00004792 | -0.00005181 | 0.00002695  |
| -0.00000257 | -0.00012150 | -0.00021026 | 0.00003807  |             | 0.00007545  | 0.00003670  | -0.00003812 | -0.00004122 | 0.000012868 |
| 0.00000204  | 0.00009625  | 0.00016656  | -0.00003016 | 0.00002389  | -0.00036031 | -0.00017527 | 0.00018204  | 0.00012682  | -0.00014224 |
| -0.00000329 | -0.00015542 | -0.00026895 | 0.00004869  | -0.00003857 | 0.00039828  | -0.00019375 | 0.00020123  | 0.00021757  | -0.00020593 |
| 0.00000285  | 0.00013463  | 0.00023298  | -0.00004218 | 0.00003342  | 0.00057661  | -0.00028050 | 0.00029133  | 0.00031498  | -0.00020593 |
| -0.00000490 | -0.00023159 | -0.00040076 | 0.00007256  | -0.00005748 | -0.00059159 | 0.00028778  | -0.00029890 | -0.00032316 | 0.00021127  |
| 0.00001101  | 0.00052026  | 0.00090030  | -0.00016300 | 0.00012913  | 0.00004691  | -0.00002282 | 0.00002370  | 0.00002563  | -0.00001675 |
| 0.00000934  | 0.00044141  | 0.00076385  | -0.00013830 | 0.00010956  | -0.00019135 | 0.00009309  | -0.00009668 | -0.00010453 | 0.00006834  |
| -0.00000695 | -0.00032846 | -0.00056840 | 0.00010291  | -0.00008152 | 0.00012187  | -0.00005929 | 0.00006158  | 0.00006658  | -0.00004352 |
| 0.00000338  | 0.00015978  | 0.00027650  | -0.00005006 | 0.00003966  | 0.00040976  | -0.00019933 | 0.00020703  | 0.00022384  | -0.00014634 |
| -0.00000351 | -0.00016595 | -0.00028718 | 0.00005199  | -0.00004119 | 0.00006389  | -0.00003108 | 0.00003228  | 0.00003490  | -0.00002282 |
| -0.00000380 | -0.00017943 | -0.00031050 | 0.00005622  | -0.00004453 | 0.00020310  | -0.00009880 | 0.00010261  | 0.00011095  | -0.00007253 |
| 0.00000248  | 0.00011730  | 0.00020299  | -0.00003675 | 0.00002911  | -0.00023463 | 0.00011414  | -0.00011854 | -0.00012817 | 0.00008379  |
| 0.00000616  | 0.00029128  | 0.00050406  | -0.00009126 | 0.00007229  | -0.00079550 | 0.00038698  | -0.00040192 | -0.00043456 | 0.00028410  |
| 0.00000237  | 0.00011197  | 0.00019376  | -0.00003508 | 0.00002779  | -0.00034097 | 0.00016587  | -0.00017227 | -0.00018626 | 0.00021177  |
| 0.00000188  | 0.00008908  | 0.00015415  | -0.00002791 | 0.00002211  | -0.00065981 | 0.00032097  | -0.00033337 | -0.00036043 | 0.00023564  |
| -0.00000900 | -0.00042540 | -0.00073615 | 0.00013328  | -0.00010558 | 0.00044878  | -0.00021831 | 0.00022674  | 0.00024515  | -0.00016027 |
| -0.00000995 | -0.00047024 | -0.00081374 | 0.00014733  | -0.00011671 | 0.00038996  | -0.00018970 | 0.00019702  | 0.00021302  | -0.00013927 |
| -0.00001440 | -0.00068078 | -0.00117808 | 0.00021330  | -0.00016897 | 0.00035084  | -0.00017067 | 0.00017726  | 0.00019165  | -0.00012530 |
| 0.00001478  | 0.00069847  | 0.00120868  | -0.00021884 | 0.00017336  | -0.00005147 | 0.00002504  | -0.00002600 | -0.00002811 | 0.00001838  |
| -0.00000117 | -0.00005539 | -0.00009585 | 0.00001735  | -0.00001375 | -0.00007950 | 0.00003867  | -0.00004167 | -0.00004343 | 0.00002839  |
| 0.00000478  | 0.00022593  | 0.00039096  | -0.00007078 | 0.00005607  | 0.00030028  | -0.00014607 | 0.00015171  | 0.00016403  | -0.00010724 |
| -0.00000304 | -0.00014389 | -0.00024900 | 0.00004508  | -0.00003571 | 0.00075234  | -0.00036598 | 0.00038011  | 0.00041098  | -0.00026868 |
| -0.00001024 | -0.00048379 | -0.00083718 | 0.00015157  | -0.00012007 | 0.00021878  |             |             |             |             |
| -0.00000160 | -0.00007543 | -0.00013053 | 0.00002363  | -0.00001872 | 0.00008410  | 0.00003233  |             |             |             |
| -0.00000507 | -0.00023979 | -0.00041495 | 0.00007513  | -0.00005951 | 0.00006691  | 0.00002572  | 0.00002046  |             |             |
| 0.00000586  | 0.00027702  | 0.00047937  | -0.00008679 | 0.00006875  | -0.00031952 | -0.00012283 | -0.00009772 | 0.00046664  |             |
| 0.00001987  | 0.00093922  | 0.00162530  | -0.00029427 | 0.00023311  | -0.00035320 | -0.00013577 | -0.00010802 | 0.00051583  | 0.00057020  |
| 0.00000852  | 0.00040257  | 0.00069664  | -0.00012613 | 0.00009992  | -0.00051134 | -0.00019656 | -0.00015638 | 0.00074678  | 0.00082550  |
| 0.00001648  | 0.00077902  | 0.00134808  | -0.00024407 | 0.00019335  | 0.00052462  | 0.00020167  | 0.00016044  | -0.00076618 | -0.00084694 |
| -0.00001121 | -0.00052986 | -0.00091691 | 0.00016601  | -0.00013151 | -0.00004160 | -0.00001599 | -0.00001272 | 0.00006076  | 0.00006716  |
| -0.00000974 | -0.00046041 | -0.00079672 | 0.00014425  | -0.00011427 | 0.00016969  | 0.00006523  | 0.00005190  | -0.00024783 | -0.00027395 |
| -0.00000876 | -0.00041422 | -0.00071680 | 0.00012978  | -0.00010281 | -0.00010808 | -0.00004155 | -0.00003305 | 0.00015784  | 0.00017448  |
| 0.00000129  | 0.00006076  | 0.00010515  | -0.00001904 | 0.00001508  | -0.00036337 | -0.00013968 | -0.00011113 | 0.00053069  | 0.00058662  |
| 0.00000199  | 0.00009386  | 0.00016243  | -0.00002941 | 0.00002330  | -0.00005666 | -0.00002178 | -0.00001733 | 0.00008274  | 0.00009147  |
| -0.00000750 | -0.00035453 | -0.00061350 | 0.00011108  | -0.00008799 | -0.00018011 | -0.00006924 | -0.00005508 | 0.00026304  | 0.00029076  |
| -0.00001879 | -0.00088826 | -0.00153711 | 0.00027830  | -0.00022046 | 0.00020807  | 0.00007998  | 0.00006363  | -0.00030387 | -0.00033590 |
| 0.00006229  | 0.00004674  |             |             |             | 0.00070545  | 0.00027118  | 0.00021575  | -0.00103028 | -0.00113887 |
| -0.00005396 | -0.00008040 | 0.00013830  |             |             | 0.00030237  | 0.00011624  | 0.00009247  | -0.00044160 | -0.00048814 |
| 0.00009281  | -0.00008040 | 0.00013830  |             |             | 0.00058512  | 0.00022493  | 0.00017895  | -0.00085454 | -0.00094461 |
| -0.00020850 | 0.00018062  | -0.00031069 | 0.00069795  |             | -0.00039798 | -0.00015299 | -0.00012171 | 0.00058123  | 0.00064249  |
| -0.00017690 | 0.00015325  | -0.00026360 | 0.00059218  | 0.00050243  | -0.00034581 | -0.00013293 | -0.00010576 | 0.00050504  | 0.00055827  |
| 0.00013164  | -0.00011403 | 0.00019615  | -0.00044065 | -0.00037387 | -0.00031112 | -0.00011960 | -0.00009515 | 0.00045438  | 0.00050227  |
| -0.00006404 | 0.00005547  | -0.00009542 | 0.00021436  | 0.00018187  | 0.00004564  | 0.00001754  | 0.00001396  | -0.00006666 | 0.00007368  |
| 0.00006651  | -0.00005761 | 0.00009910  | -0.00022264 | -0.00018889 | 0.00007050  | 0.00002710  | 0.00002156  | -0.00010296 | -0.00011382 |
| 0.00007191  | -0.00006229 | 0.00010715  | -0.00024071 | -0.00020423 | -0.00026629 | -0.00010236 | -0.00008144 | 0.00038890  | 0.00042989  |
| -0.00004701 | 0.00004072  | -0.00007005 | 0.00015737  | 0.00013352  | -0.00066717 | -0.00025647 | -0.00020404 | 0.00097437  | 0.00107707  |
| -0.00011674 | 0.00010112  | -0.00017395 | 0.00039077  | 0.00033155  | 0.00119510  |             |             |             |             |
| -0.00004487 | 0.00003887  | -0.00006687 | 0.00015022  | 0.00012745  | -0.00122614 | 0.00125799  |             |             |             |
| -0.00003570 | 0.00003093  | -0.00005320 | 0.00011951  | 0.00010140  | 0.00009723  | -0.00009976 | 0.00000791  |             |             |
| 0.00017049  | -0.00014769 | 0.00025404  | -0.00057070 | -0.00048421 | -0.00039661 | 0.00040691  | -0.00003227 | 0.00013162  |             |
| 0.00018846  | -0.00016325 | 0.00028082  | -0.00063085 | -0.00053524 | 0.00025260  | -0.00025916 | 0.00002055  | -0.00008383 | 0.00005339  |
| 0.00027283  | -0.00023635 | 0.00040655  | -0.00091330 | -0.00077489 | 0.00084928  | -0.00087134 | 0.00006910  | -0.00028184 | 0.00017950  |
| -0.00027992 | 0.00024249  | -0.00041711 | 0.00093702  | 0.00079502  | 0.00013242  | -0.00013586 | 0.00001077  | -0.00004394 | 0.00002799  |
| 0.00002220  | -0.00001923 | 0.00003308  | -0.00007431 | -0.00006304 | 0.00042095  | -0.00043188 | 0.00003425  | -0.00013970 | 0.00008897  |
| -0.00009054 | 0.00007843  | -0.00013492 | 0.00030309  | 0.00025716  | -0.00048630 | 0.00049893  | -0.00003957 | 0.00016138  | -0.00010279 |
| 0.00005767  | -0.00004995 | 0.00008593  | -0.00019304 | -0.00016378 | -0.00164878 | 0.00169161  | -0.00013414 | 0.00054717  | -0.00034849 |
| 0.00019388  | -0.00016796 | 0.00028891  | -0.00064902 | -0.00055066 | -0.00070670 | 0.00072506  | -0.00005750 | 0.00023453  | -0.00014937 |
| 0.00003023  | -0.00002619 | 0.00004505  | -0.00010120 | -0.00008586 | -0.00136755 | 0.00140307  | -0.00011126 | 0.00045384  | -0.00028905 |
| 0.00009610  | -0.00008325 | 0.00014320  | -0.00032169 | -0.00027294 | 0.00093016  | -0.00095432 | 0.00007568  | -0.00030868 | 0.00019660  |
| -0.00011102 | 0.00009617  | -0.00016543 | 0.00037163  | 0.00031531  | 0.00080824  | -0.00082923 | 0.00006576  | -0.00026822 | 0.00017083  |
| -0.00037641 | 0.00032607  | -0.00056089 | 0.00126001  | 0.00106905  | 0.00072716  | -0.00074605 | 0.00005916  | -0.00024132 | 0.00015369  |
| -0.00016134 | 0.00013976  | -0.00024041 | 0.00054007  | 0.00045822  | -0.00010667 | 0.00010944  | -0.00000868 | 0.00003540  | -0.00002255 |
| -0.00031220 | 0.00027045  | -0.00046522 | 0.00104509  | 0.00088671  | -0.00016477 | 0.00016905  | -0.00001341 | 0.00005468  | -0.00003483 |
| 0.00021235  | -0.00018395 | 0.00031642  | -0.00071083 | -0.00060311 | 0.00062237  | -0.00063853 | 0.00005064  | -0.00020654 | 0.00013155  |
| 0.00018452  | -0.00015984 | 0.00027495  | -0.00061766 | -0.00052405 | 0.00155932  | -0.00159982 | 0.00012686  | -0.00051748 | 0.00032958  |
| 0.00016601  | -0.00014381 | 0.00024737  | -0.00055570 | -0.00047148 | 0.00060352  |             |             |             |             |
| -0.00002435 | 0.00002110  | -0.00003629 | 0.00008152  | 0.00006916  | 0.00009410  | 0.00001467  |             |             |             |
| -0.00003762 | 0.00003259  | -0.00005605 | 0.00012592  | 0.00010684  | 0.00029914  | 0.00004664  | 0.00014827  |             |             |
| 0.00014208  | -0.00012308 | 0.00021172  | -0.00047562 | -0.00040354 | -0.00034558 | -0.00005388 | -0.00017129 | 0.00019788  |             |
| 0.00035598  | -0.00030838 | 0.00053045  | -0.00119164 | -0.00101104 | -0.00117168 | -0.00018269 | -0.00058074 | 0.00067091  | 0.00227469  |
| 0.00027820  |             |             |             |             | -0.00050221 | -0.00007830 | -0.00024892 | 0.00028757  | 0.00097498  |
| -0.00013533 | 0.00006583  |             |             |             | -0.00097183 | -0.00015153 | -0.00048169 | 0.00055647  | 0.00188670  |
| 0.00014056  | -0.00006838 | 0.00007102  |             |             | 0.00066100  | 0.00010306  | 0.00032763  | -0.00037849 | -0.00128326 |

|             |             |             |             |             |
|-------------|-------------|-------------|-------------|-------------|
| 0.00057436  | 0.00008955  | 0.00028468  | -0.00032888 | -0.00111506 |
| 0.00051674  | 0.00008057  | 0.00025612  | -0.00029589 | -0.00100320 |
| -0.00007580 | -0.00001182 | -0.00003757 | 0.00004341  | 0.00014716  |
| -0.00011709 | -0.00001826 | -0.00005804 | 0.00006705  | 0.00022733  |
| 0.00044227  | 0.00006896  | 0.00021921  | -0.00025325 | -0.00085863 |
| 0.00110810  | 0.00017277  | 0.00054923  | -0.00063450 | -0.00215126 |

|             |             |             |             |             |
|-------------|-------------|-------------|-------------|-------------|
| 0.00041790  |             |             |             |             |
| 0.00080868  | 0.00156489  |             |             |             |
| -0.00055004 | -0.00106438 | 0.00072395  |             |             |
| -0.00047794 | -0.00092486 | 0.00062906  | 0.00054660  |             |
| -0.00043000 | -0.00083209 | 0.00056596  | 0.00049177  | 0.00044244  |
| 0.00006308  | 0.00012206  | -0.00008302 | -0.00007214 | -0.00006490 |
| 0.00009744  | 0.00018855  | -0.00012825 | -0.00011144 | -0.00010026 |
| -0.00036803 | -0.00071218 | 0.00048440  | 0.00042090  | 0.00037868  |
| -0.00092208 | -0.00178432 | 0.00121363  | 0.00105455  | 0.00094877  |

|             |             |            |            |  |
|-------------|-------------|------------|------------|--|
| 0.00000952  |             |            |            |  |
| 0.00001471  | 0.00002272  |            |            |  |
| -0.00005555 | -0.00008581 | 0.00032411 |            |  |
| -0.00013918 | -0.00021499 | 0.00081204 | 0.00203453 |  |
